# Supplementary material for: Anthropogenic debris in seafood: Plastic debris and fibers from textiles in fish and bivalves sold for human consumption
Source: PubMed Central journal article supplement (PMC4585829; doi:10.1038/srep14340), 2015-09-24
Supplement: srep14340-s1.pdf [file srep14340-s1.pdf]

## Supplementary Material

### **Anthropogenic debris in seafood: Plastic debris and fibers from textiles in fish and bivalves sold for human consumption**

Rochman, Chelsea M<sup>1\*</sup>; Tahir, Akbar<sup>2</sup>; Williams, Susan L.<sup>3</sup>; Baxa, Dolores V<sup>1</sup>; Lam, Rosalyn<sup>1</sup>; Miller, Jeffrey T<sup>4</sup>; Teh, Foo-Ching<sup>1</sup>; Werorilangi, Shinta<sup>2</sup>; Teh, Swee J<sup>1</sup>

<sup>1</sup>Aquatic Health Program, School of Veterinary Medicine, University of California, Davis, Davis, CA 95616, USA.

<sup>2</sup>Department of Marine Science, Faculty Marine and Fisheries Sciences, University of Hasanuddin, Makassar 90245, Indonesia.

<sup>3</sup>Bodega Marine Laboratory and Department of Evolution and Ecology, University of California at Davis, Bodega Bay, CA 94923, USA

<sup>4</sup>Department of Environmental Toxicology, University of California, Davis, Davis, CA, 95616, USA

#### *Table of Contents*

**Table S1. Data from each individual fish sampled from Indonesia**

**Table S2. Data from each individual fish sampled from USA**

**Table S3. Type and size of anthropogenic debris sampled from Indonesia**

**Table S4. Type and size of anthropogenic debris sampled from the USA**

**Figure S1. Images of individual pieces of anthropogenic debris found in samples from Indonesia.**

**Figure S2. Images of individual pieces of anthropogenic debris found in samples from California.**

47 **Table S1. Data from each individual fish sampled from Indonesia**

| Sample # | Location            | common name ( <i>Genus, species</i> )             | No. Pieces of Anthropogenic Debris | No. Pieces of Plastic Debris | No. of Fibers |
|----------|---------------------|---------------------------------------------------|------------------------------------|------------------------------|---------------|
| 1        | Makassar, Indonesia | tilapia ( <i>Oreochromis niloticus</i> )          | 0                                  | 0                            | 0             |
| 2        | Makassar, Indonesia | tilapia ( <i>Oreochromis niloticus</i> )          | 0                                  | 0                            | 0             |
| 3        | Makassar, Indonesia | tilapia ( <i>Oreochromis niloticus</i> )          | 0                                  | 0                            | 0             |
| 4        | Makassar, Indonesia | tilapia ( <i>Oreochromis niloticus</i> )          | 0                                  | 0                            | 0             |
| 5        | Makassar, Indonesia | tilapia ( <i>Oreochromis niloticus</i> )          | 0                                  | 0                            | 0             |
| 6        | Makassar, Indonesia | skipjack tuna ( <i>Katsuwonus pelamis</i> )       | 0                                  | 0                            | 0             |
| 7        | Makassar, Indonesia | skipjack tuna ( <i>Katsuwonus pelamis</i> )       | 0                                  | 0                            | 0             |
| 8        | Makassar, Indonesia | skipjack tuna ( <i>Katsuwonus pelamis</i> )       | 0                                  | 0                            | 0             |
| 9        | Makassar, Indonesia | skipjack tuna ( <i>Katsuwonus pelamis</i> )       | 0                                  | 0                            | 0             |
| 10       | Makassar, Indonesia | skipjack tuna ( <i>Katsuwonus pelamis</i> )       | 0                                  | 0                            | 0             |
| 11       | Makassar, Indonesia | skipjack tuna ( <i>Katsuwonus pelamis</i> )       | 0                                  | 0                            | 0             |
| 12       | Makassar, Indonesia | skipjack tuna ( <i>Katsuwonus pelamis</i> )       | 0                                  | 0                            | 0             |
| 13       | Makassar, Indonesia | skipjack tuna ( <i>Katsuwonus pelamis</i> )       | 0                                  | 0                            | 0             |
| 14       | Makassar, Indonesia | skipjack tuna ( <i>Katsuwonus pelamis</i> )       | 0                                  | 0                            | 0             |
| 15       | Makassar, Indonesia | indian Mackerel ( <i>Rastrelliger kanagurta</i> ) | 2                                  | 2                            | 0             |
| 16       | Makassar, Indonesia | indian Mackerel ( <i>Rastrelliger kanagurta</i> ) | 0                                  | 0                            | 0             |
| 17       | Makassar, Indonesia | indian Mackerel ( <i>Rastrelliger kanagurta</i> ) | 1                                  | 1                            | 0             |
| 18       | Makassar, Indonesia | indian Mackerel ( <i>Rastrelliger kanagurta</i> ) | 1                                  | 1                            | 0             |
| 19       | Makassar, Indonesia | indian Mackerel ( <i>Rastrelliger kanagurta</i> ) | 0                                  | 0                            | 0             |
| 20       | Makassar, Indonesia | indian Mackerel ( <i>Rastrelliger kanagurta</i> ) | 2                                  | 2                            | 0             |
| 21       | Makassar, Indonesia | indian Mackerel ( <i>Rastrelliger kanagurta</i> ) | 3                                  | 3                            | 0             |
| 22       | Makassar, Indonesia | indian Mackerel ( <i>Rastrelliger kanagurta</i> ) | 0                                  | 0                            | 0             |
| 23       | Makassar, Indonesia | indian Mackerel ( <i>Rastrelliger kanagurta</i> ) | 0                                  | 0                            | 0             |
| 24       | Makassar, Indonesia | shortfin scad ( <i>Decapterus macrosoma</i> )     | 0                                  | 0                            | 0             |
| 25       | Makassar, Indonesia | shortfin scad ( <i>Decapterus macrosoma</i> )     | 2                                  | 2                            | 0             |
| 26       | Makassar, Indonesia | shortfin scad ( <i>Decapterus macrosoma</i> )     | 17                                 | 17                           | 0             |
| 27       | Makassar, Indonesia | shortfin scad ( <i>Decapterus macrosoma</i> )     | 21                                 | 21                           | 0             |
| 28       | Makassar, Indonesia | shortfin scad ( <i>Decapterus macrosoma</i> )     | 0                                  | 0                            | 0             |
| 29       | Makassar, Indonesia | shortfin scad ( <i>Decapterus macrosoma</i> )     | 1                                  | 1                            | 0             |
| 30       | Makassar, Indonesia | shortfin scad ( <i>Decapterus macrosoma</i> )     | 1                                  | 1                            | 0             |
| 31       | Makassar, Indonesia | shortfin scad ( <i>Decapterus macrosoma</i> )     | 0                                  | 0                            | 0             |
| 32       | Makassar, Indonesia | shortfin scad ( <i>Decapterus macrosoma</i> )     | 0                                  | 0                            | 0             |
| 33       | Makassar, Indonesia | shortfin scad ( <i>Decapterus macrosoma</i> )     | 0                                  | 0                            | 0             |
| 34       | Makassar, Indonesia | shortfin scad ( <i>Decapterus macrosoma</i> )     | 0                                  | 0                            | 0             |
| 35       | Makassar, Indonesia | shortfin scad ( <i>Decapterus macrosoma</i> )     | 0                                  | 0                            | 0             |
| 36       | Makassar, Indonesia | shortfin scad ( <i>Decapterus macrosoma</i> )     | 0                                  | 0                            | 0             |
| 37       | Makassar, Indonesia | shortfin scad ( <i>Decapterus macrosoma</i> )     | 0                                  | 0                            | 0             |
| 38       | Makassar, Indonesia | shortfin scad ( <i>Decapterus macrosoma</i> )     | 0                                  | 0                            | 0             |
| 39       | Makassar, Indonesia | shortfin scad ( <i>Decapterus macrosoma</i> )     | 0                                  | 0                            | 0             |
| 40       | Makassar, Indonesia | shortfin scad ( <i>Decapterus macrosoma</i> )     | 0                                  | 0                            | 0             |
| 41       | Makassar, Indonesia | herring ( <i>Spratelloides gracilis</i> )         | 0                                  | 0                            | 0             |
| 42       | Makassar, Indonesia | herring ( <i>Spratelloides gracilis</i> )         | 5                                  | 5                            | 0             |
| 43       | Makassar, Indonesia | herring ( <i>Spratelloides gracilis</i> )         | 1                                  | 1                            | 0             |
| 44       | Makassar, Indonesia | herring ( <i>Spratelloides gracilis</i> )         | 0                                  | 0                            | 0             |
| 45       | Makassar, Indonesia | herring ( <i>Spratelloides gracilis</i> )         | 0                                  | 0                            | 0             |
| 46       | Makassar, Indonesia | herring ( <i>Spratelloides gracilis</i> )         | 3                                  | 3                            | 0             |
| 47       | Makassar, Indonesia | herring ( <i>Spratelloides gracilis</i> )         | 0                                  | 0                            | 0             |
| 48       | Makassar, Indonesia | herring ( <i>Spratelloides gracilis</i> )         | 0                                  | 0                            | 0             |
| 49       | Makassar, Indonesia | herring ( <i>Spratelloides gracilis</i> )         | 2                                  | 2                            | 0             |
| 50       | Makassar, Indonesia | herring ( <i>Spratelloides gracilis</i> )         | 0                                  | 0                            | 0             |
| 51       | Makassar, Indonesia | family Carangidae (??, ??)                        | 10                                 | 10                           | 0             |
| 52       | Makassar, Indonesia | family Carangidae (??, ??)                        | 5                                  | 5                            | 0             |
| 53       | Makassar, Indonesia | family Carangidae (??, ??)                        | 0                                  | 0                            | 0             |
| 54       | Makassar, Indonesia | family Carangidae (??, ??)                        | 14                                 | 14                           | 0             |
| 55       | Makassar, Indonesia | family Carangidae (??, ??)                        | 5                                  | 5                            | 0             |
| 56       | Makassar, Indonesia | family Carangidae (??, ??)                        | 0                                  | 0                            | 0             |
| 57       | Makassar, Indonesia | family Carangidae (??, ??)                        | 7                                  | 7                            | 0             |
| 58       | Makassar, Indonesia | rabbitfish ( <i>Siganus argenteus</i> )           | 1                                  | 1                            | 0             |
| 59       | Makassar, Indonesia | rabbitfish ( <i>Siganus argenteus</i> )           | 0                                  | 0                            | 0             |
| 60       | Makassar, Indonesia | rabbitfish ( <i>Siganus fuscescens</i> )          | 0                                  | 0                            | 0             |
| 61       | Makassar, Indonesia | rabbitfish ( <i>Siganus fuscescens</i> )          | 0                                  | 0                            | 0             |
| 62       | Makassar, Indonesia | rabbitfish ( <i>Siganus canaliculatus</i> )       | 0                                  | 0                            | 0             |
| 63       | Makassar, Indonesia | rabbitfish ( <i>Siganus canaliculatus</i> )       | 1                                  | 1                            | 0             |
| 64       | Makassar, Indonesia | rabbitfish ( <i>Siganus canaliculatus</i> )       | 0                                  | 0                            | 0             |
| 65       | Makassar, Indonesia | humpback red snapper ( <i>Lutjanus gibbus</i> )   | 0                                  | 0                            | 0             |
| 66       | Makassar, Indonesia | humpback red snapper ( <i>Lutjanus gibbus</i> )   | 0                                  | 0                            | 0             |
| 67       | Makassar, Indonesia | humpback red snapper ( <i>Lutjanus gibbus</i> )   | 0                                  | 0                            | 0             |
| 68       | Makassar, Indonesia | humpback red snapper ( <i>Lutjanus gibbus</i> )   | 0                                  | 0                            | 0             |
| 69       | Makassar, Indonesia | humpback red snapper ( <i>Lutjanus gibbus</i> )   | 0                                  | 0                            | 0             |
| 70       | Makassar, Indonesia | oxeye scad ( <i>Selar boops</i> )                 | 0                                  | 0                            | 0             |
| 71       | Makassar, Indonesia | oxeye scad ( <i>Selar boops</i> )                 | 0                                  | 0                            | 0             |
| 72       | Makassar, Indonesia | oxeye scad ( <i>Selar boops</i> )                 | 0                                  | 0                            | 0             |
| 73       | Makassar, Indonesia | oxeye scad ( <i>Selar boops</i> )                 | 0                                  | 0                            | 0             |
| 74       | Makassar, Indonesia | oxeye scad ( <i>Selar boops</i> )                 | 0                                  | 0                            | 0             |
| 75       | Makassar, Indonesia | oxeye scad ( <i>Selar boops</i> )                 | 0                                  | 0                            | 0             |
| 76       | Makassar, Indonesia | oxeye scad ( <i>Selar boops</i> )                 | 0                                  | 0                            | 0             |

49 **Table S2. Data from each individual fish and bivalve sampled from USA**

| Sample # | Location        | common name ( <i>Genus, species</i> )              | No. Pieces of Anthropogenic Debris | No. Pieces of Plastic Debris | No. of Fibers |
|----------|-----------------|----------------------------------------------------|------------------------------------|------------------------------|---------------|
| 1        | California, USA | pacific oyster ( <i>Crassostrea gigas</i> )        | 0                                  | 0                            | 0             |
| 2        | California, USA | pacific oyster ( <i>Crassostrea gigas</i> )        | 2                                  | 0                            | 2             |
| 3        | California, USA | pacific oyster ( <i>Crassostrea gigas</i> )        | 0                                  | 0                            | 0             |
| 4        | California, USA | pacific oyster ( <i>Crassostrea gigas</i> )        | 0                                  | 0                            | 0             |
| 5        | California, USA | pacific oyster ( <i>Crassostrea gigas</i> )        | 2                                  | 0                            | 2             |
| 6        | California, USA | pacific oyster ( <i>Crassostrea gigas</i> )        | 0                                  | 0                            | 0             |
| 7        | California, USA | pacific oyster ( <i>Crassostrea gigas</i> )        | 0                                  | 0                            | 0             |
| 8        | California, USA | pacific oyster ( <i>Crassostrea gigas</i> )        | 0                                  | 0                            | 0             |
| 9        | California, USA | pacific oyster ( <i>Crassostrea gigas</i> )        | 1                                  | 0                            | 1             |
| 10       | California, USA | pacific oyster ( <i>Crassostrea gigas</i> )        | 0                                  | 0                            | 0             |
| 11       | California, USA | pacific oyster ( <i>Crassostrea gigas</i> )        | 0                                  | 0                            | 0             |
| 12       | California, USA | pacific oyster ( <i>Crassostrea gigas</i> )        | 2                                  | 0                            | 2             |
| 13       | California, USA | jacksmelt ( <i>Atherinopsis californiensis</i> )   | 0                                  | 0                            | 0             |
| 14       | California, USA | jacksmelt ( <i>Atherinopsis californiensis</i> )   | 0                                  | 0                            | 0             |
| 15       | California, USA | jacksmelt ( <i>Atherinopsis californiensis</i> )   | 0                                  | 0                            | 0             |
| 16       | California, USA | jacksmelt ( <i>Atherinopsis californiensis</i> )   | 1                                  | 1                            | 0             |
| 17       | California, USA | jacksmelt ( <i>Atherinopsis californiensis</i> )   | 0                                  | 0                            | 0             |
| 18       | California, USA | jacksmelt ( <i>Atherinopsis californiensis</i> )   | 10                                 | 0                            | 10            |
| 19       | California, USA | jacksmelt ( <i>Atherinopsis californiensis</i> )   | 0                                  | 0                            | 0             |
| 20       | California, USA | pacific anchovy ( <i>Engraulis mordax</i> )        | 0                                  | 0                            | 0             |
| 21       | California, USA | pacific anchovy ( <i>Engraulis mordax</i> )        | 0                                  | 0                            | 0             |
| 22       | California, USA | pacific anchovy ( <i>Engraulis mordax</i> )        | 0                                  | 0                            | 0             |
| 23       | California, USA | pacific anchovy ( <i>Engraulis mordax</i> )        | 1                                  | 1                            | 0             |
| 24       | California, USA | pacific anchovy ( <i>Engraulis mordax</i> )        | 0                                  | 0                            | 0             |
| 25       | California, USA | pacific anchovy ( <i>Engraulis mordax</i> )        | 1                                  | 0                            | 1             |
| 26       | California, USA | pacific anchovy ( <i>Engraulis mordax</i> )        | 0                                  | 0                            | 0             |
| 27       | California, USA | pacific anchovy ( <i>Engraulis mordax</i> )        | 0                                  | 0                            | 0             |
| 28       | California, USA | pacific anchovy ( <i>Engraulis mordax</i> )        | 1                                  | 1                            | 0             |
| 29       | California, USA | pacific anchovy ( <i>Engraulis mordax</i> )        | 0                                  | 0                            | 0             |
| 30       | California, USA | pacific mackerel ( <i>Scomber japonicus</i> )      | 0                                  | 0                            | 0             |
| 31       | California, USA | yellowtail rockfish ( <i>Sebastes flavidus</i> )   | 0                                  | 0                            | 0             |
| 32       | California, USA | yellowtail rockfish ( <i>Sebastes flavidus</i> )   | 1                                  | 0                            | 1             |
| 33       | California, USA | yellowtail rockfish ( <i>Sebastes flavidus</i> )   | 0                                  | 0                            | 0             |
| 34       | California, USA | striped bass ( <i>Morone saxatilis</i> )           | 2                                  | 1                            | 1             |
| 35       | California, USA | striped bass ( <i>Morone saxatilis</i> )           | 3                                  | 1                            | 2             |
| 36       | California, USA | striped bass ( <i>Morone saxatilis</i> )           | 1                                  | 0                            | 1             |
| 37       | California, USA | striped bass ( <i>Morone saxatilis</i> )           | 0                                  | 0                            | 0             |
| 38       | California, USA | striped bass ( <i>Morone saxatilis</i> )           | 0                                  | 0                            | 0             |
| 39       | California, USA | striped bass ( <i>Morone saxatilis</i> )           | 0                                  | 0                            | 0             |
| 40       | California, USA | striped bass ( <i>Morone saxatilis</i> )           | 0                                  | 0                            | 0             |
| 41       | California, USA | chinook salmon ( <i>Oncorhynchus tshawytscha</i> ) | 0                                  | 0                            | 0             |
| 42       | California, USA | chinook salmon ( <i>Oncorhynchus tshawytscha</i> ) | 0                                  | 0                            | 0             |
| 43       | California, USA | chinook salmon ( <i>Oncorhynchus tshawytscha</i> ) | 1                                  | 0                            | 1             |
| 44       | California, USA | chinook salmon ( <i>Oncorhynchus tshawytscha</i> ) | 0                                  | 0                            | 0             |
| 45       | California, USA | albacore tuna ( <i>Thunnus alalunga</i> )          | 0                                  | 0                            | 0             |
| 46       | California, USA | albacore tuna ( <i>Thunnus alalunga</i> )          | 0                                  | 0                            | 0             |
| 47       | California, USA | blue rockfish ( <i>Sebastes mystinus</i> )         | 0                                  | 0                            | 0             |
| 48       | California, USA | blue rockfish ( <i>Sebastes mystinus</i> )         | 1                                  | 0                            | 1             |
| 49       | California, USA | blue rockfish ( <i>Sebastes mystinus</i> )         | 0                                  | 0                            | 0             |
| 50       | California, USA | blue rockfish ( <i>Sebastes mystinus</i> )         | 0                                  | 0                            | 0             |
| 51       | California, USA | blue rockfish ( <i>Sebastes mystinus</i> )         | 0                                  | 0                            | 0             |
| 52       | California, USA | blue rockfish ( <i>Sebastes mystinus</i> )         | 0                                  | 0                            | 0             |
| 53       | California, USA | blue rockfish ( <i>Sebastes mystinus</i> )         | 0                                  | 0                            | 0             |
| 54       | California, USA | blue rockfish ( <i>Sebastes mystinus</i> )         | 0                                  | 0                            | 0             |
| 55       | California, USA | blue rockfish ( <i>Sebastes mystinus</i> )         | 0                                  | 0                            | 0             |
| 56       | California, USA | blue rockfish ( <i>Sebastes mystinus</i> )         | 1                                  | 1                            | 1             |
| 57       | California, USA | pacific sanddab ( <i>Citharichthys sordidus</i> )  | 1                                  | 0                            | 1             |
| 58       | California, USA | pacific sanddab ( <i>Citharichthys sordidus</i> )  | 1                                  | 0                            | 1             |
| 59       | California, USA | pacific sanddab ( <i>Citharichthys sordidus</i> )  | 3                                  | 1                            | 2             |
| 60       | California, USA | pacific sanddab ( <i>Citharichthys sordidus</i> )  | 0                                  | 0                            | 0             |
| 61       | California, USA | pacific sanddab ( <i>Citharichthys sordidus</i> )  | 0                                  | 0                            | 0             |
| 62       | California, USA | lingcod ( <i>Ophiodon elongatus</i> )              | 1                                  | 0                            | 1             |
| 63       | California, USA | lingcod ( <i>Ophiodon elongatus</i> )              | 0                                  | 0                            | 0             |
| 64       | California, USA | lingcod ( <i>Ophiodon elongatus</i> )              | 0                                  | 0                            | 0             |
| 65       | California, USA | lingcod ( <i>Ophiodon elongatus</i> )              | 0                                  | 0                            | 0             |
| 66       | California, USA | lingcod ( <i>Ophiodon elongatus</i> )              | 0                                  | 0                            | 0             |
| 67       | California, USA | lingcod ( <i>Ophiodon elongatus</i> )              | 0                                  | 0                            | 0             |
| 68       | California, USA | lingcod ( <i>Ophiodon elongatus</i> )              | 0                                  | 0                            | 0             |
| 69       | California, USA | lingcod ( <i>Ophiodon elongatus</i> )              | 0                                  | 0                            | 0             |
| 70       | California, USA | lingcod ( <i>Ophiodon elongatus</i> )              | 0                                  | 0                            | 0             |
| 71       | California, USA | lingcod ( <i>Ophiodon elongatus</i> )              | 0                                  | 0                            | 0             |
| 72       | California, USA | lingcod ( <i>Ophiodon elongatus</i> )              | 0                                  | 0                            | 0             |
| 73       | California, USA | copper rockfish ( <i>Sebastes caurinus</i> )       | 0                                  | 0                            | 0             |
| 74       | California, USA | vermilion rockfish ( <i>Sebastes miniatus</i> )    | 0                                  | 0                            | 0             |
| 75       | California, USA | vermilion rockfish ( <i>Sebastes miniatus</i> )    | 0                                  | 0                            | 0             |
| 76       | California, USA | vermilion rockfish ( <i>Sebastes miniatus</i> )    | 0                                  | 0                            | 0             |



| Sample # | Debris Type          | length (mm) | width (mm) |
|----------|----------------------|-------------|------------|
| 52       | plastic fragment     | N/A         | N/A        |
| 52       | plastic fragment     | N/A         | N/A        |
| 52       | plastic fragment     | N/A         | N/A        |
| 54       | plastic fragment     | N/A         | N/A        |
| 54       | plastic fragment     | N/A         | N/A        |
| 54       | plastic fragment     | N/A         | N/A        |
| 54       | plastic fragment     | N/A         | N/A        |
| 54       | plastic fragment     | N/A         | N/A        |
| 54       | plastic fragment     | N/A         | N/A        |
| 54       | plastic fragment     | N/A         | N/A        |
| 54       | plastic fragment     | N/A         | N/A        |
| 54       | plastic fragment     | N/A         | N/A        |
| 54       | plastic fragment     | N/A         | N/A        |
| 54       | plastic fragment     | N/A         | N/A        |
| 54       | plastic fragment     | N/A         | N/A        |
| 54       | plastic fragment     | N/A         | N/A        |
| 54       | plastic fragment     | N/A         | N/A        |
| 54       | plastic fragment     | N/A         | N/A        |
| 54       | plastic fragment     | N/A         | N/A        |
| 55       | plastic fragment     | N/A         | N/A        |
| 55       | plastic fragment     | N/A         | N/A        |
| 55       | plastic fragment     | N/A         | N/A        |
| 55       | plastic fragment     | N/A         | N/A        |
| 55       | plastic fragment     | N/A         | N/A        |
| 57       | plastic fragment     | N/A         | N/A        |
| 57       | plastic fragment     | N/A         | N/A        |
| 57       | plastic fragment     | N/A         | N/A        |
| 57       | plastic fragment     | N/A         | N/A        |
| 57       | plastic fragment     | N/A         | N/A        |
| 57       | plastic fragment     | N/A         | N/A        |
| 57       | plastic fragment     | N/A         | N/A        |
| 57       | plastic fragment     | N/A         | N/A        |
| 58       | plastic fragment     | 2           | 3.1        |
| 63       | plastic monofilament | 36.56       | 0.198      |

54  
55  
56  
57  
58  
59  
60  
61  
62  
63  
64  
65  
66  
67  
68  
69  
70  
71  
72  
73  
74  
75  
76  
77  
78  
79  
80

81 **Table S4. Type and size of each piece of anthropogenic debris sampled from the USA. N/A**  
 82 **denotes where a picture was not available or acceptable to measure the size of the debris.**

| Sample # | Debris Type          | length (mm) | width (mm) |
|----------|----------------------|-------------|------------|
| 2        | fiber                | N/A         | N/A        |
| 2        | fiber                | N/A         | N/A        |
| 5        | fiber                | 3.281       | 0.049      |
| 5        | fiber                | 15.841      | 0.02       |
| 9        | fiber                | 2.273       | 0.04       |
| 12       | fiber                | 3.521       | 0.029      |
| 12       | fiber                | 2.451       | 0.036      |
| 16       | plastic fragment     | 2.593       | 0.438      |
| 18       | fiber                | 2.68        | 0.02       |
| 18       | fiber                | 4.792       | 0.024      |
| 18       | fiber                | 2.252       | 0.019      |
| 18       | fiber                | 3.322       | 0.019      |
| 18       | fiber                | N/A         | N/A        |
| 18       | fiber                | N/A         | N/A        |
| 18       | fiber                | N/A         | N/A        |
| 18       | fiber                | N/A         | N/A        |
| 18       | fiber                | N/A         | N/A        |
| 18       | fiber                | N/A         | N/A        |
| 23       | film                 | 1.115       | 1.005      |
| 25       | fiber                | 6.298       | 0.029      |
| 28       | plastic monofilament | 16.872      | 0.022      |
| 32       | fiber                | 3.445       | 0.024      |
| 34       | fiber                | 7.424       | 0.031      |
| 34       | film                 | 19.985      | 2.07       |
| 35       | fiber                | 6.077       | 0.021      |
| 35       | fiber                | 3.405       | 0.029      |
| 35       | foam                 | 0.375       | 0.563      |
| 36       | fiber                | 6.448       | 0.026      |
| 43       | fiber                | 28.8        | 0.036      |
| 48       | fiber                | 2.4         | 0.016      |
| 56       | fiber                | N/A         | N/A        |
| 57       | fiber                | 2.688       | 0.008      |
| 58       | fiber                | 4.959       | 0.021      |
| 59       | fiber                | 5.269       | 0.014      |
| 59       | fiber                | 6.155       | 0.033      |
| 59       | film                 | 3.312       | 1.314      |
| 62       | fiber                | 3.445       | 0.024      |

83  
 84  
 85  
 86  
 87  
 88  
 89  
 90  
 91  
 92  
 93  
 94  
 95  
 96  
 97  
 98  
 99  
 100  
 101  
 102  
 103  
 104

105 **Figure S1. Images of several of the individual pieces of anthropogenic debris found in**  
106 **samples from Indonesia.**  
107

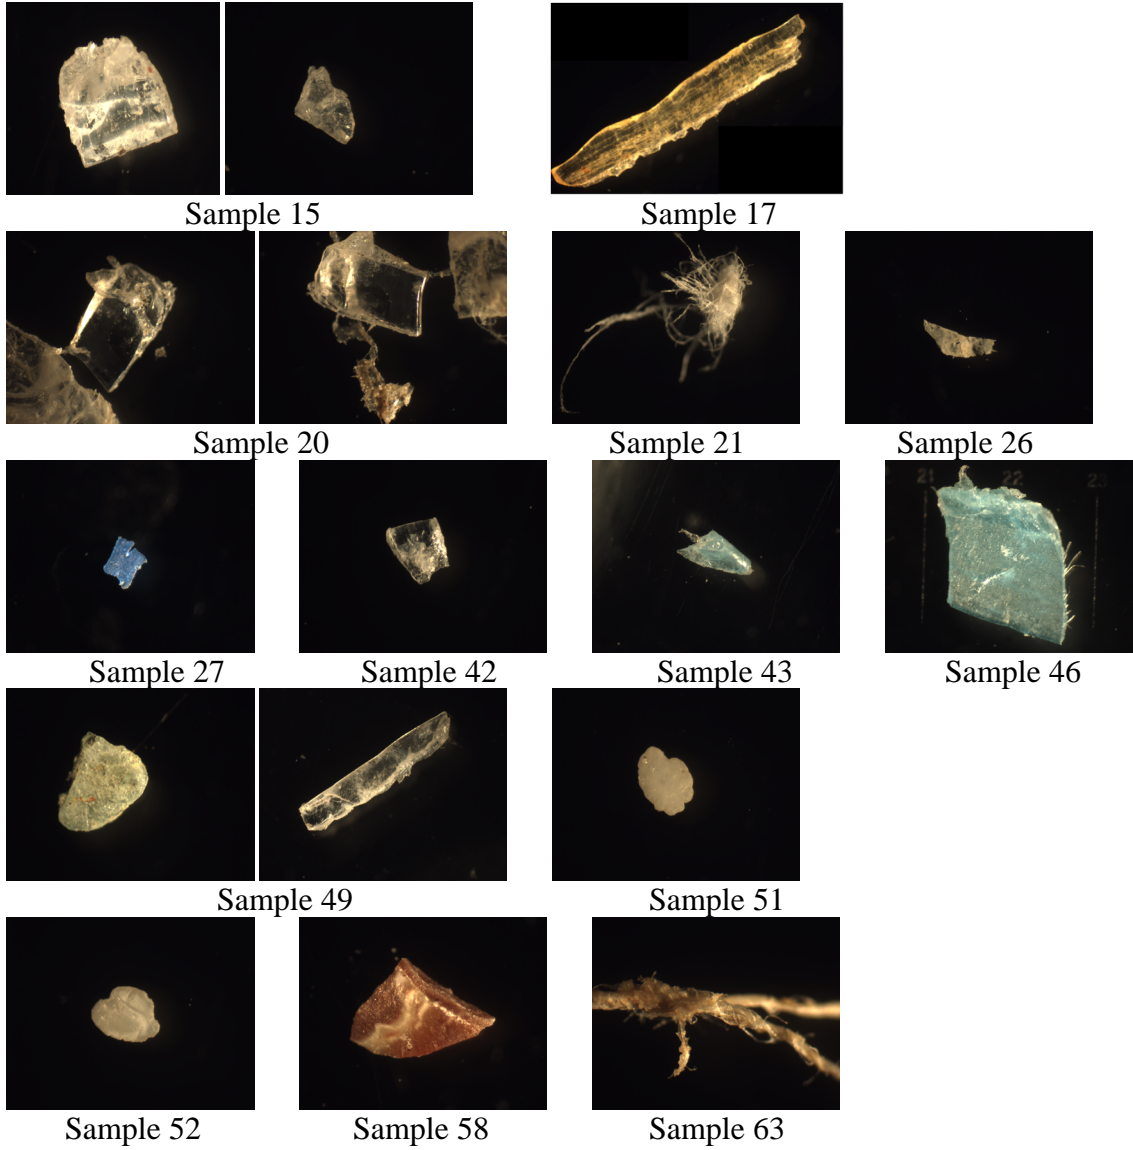

130 **Figure S2. Images of several of the individual pieces of anthropogenic debris found in**  
131 **samples from California.**  
132

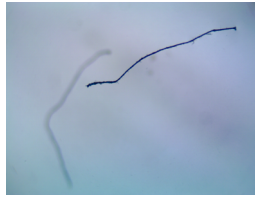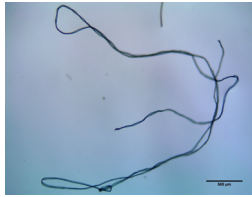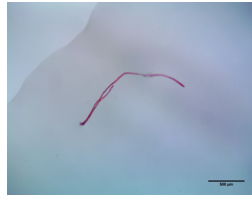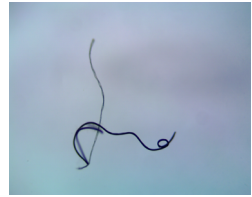

133  
134 Sample 5

Sample 9

Sample 12 (2 fibers)

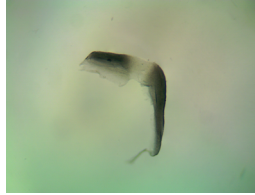

135  
136 Sample 16

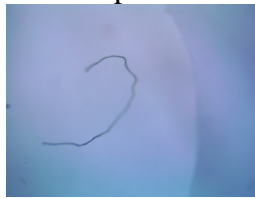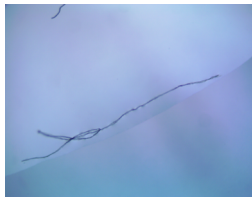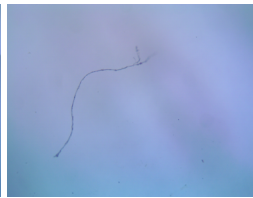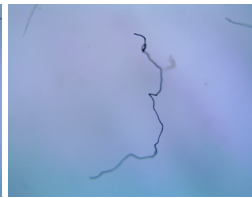

137  
138 Sample 18

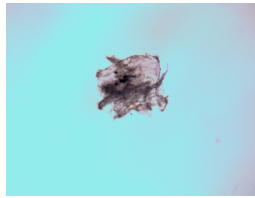

139  
140 Sample 23

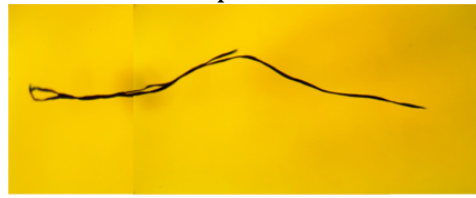

Sample 25

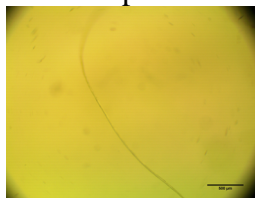

141  
142 Sample 28

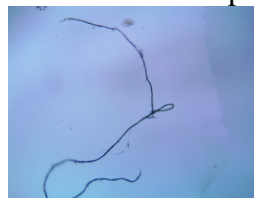

Sample 32

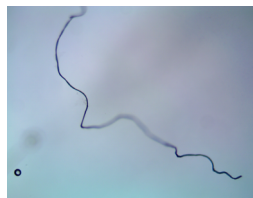

Sample 34

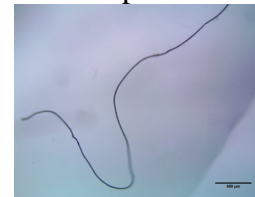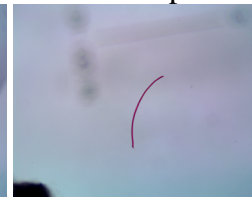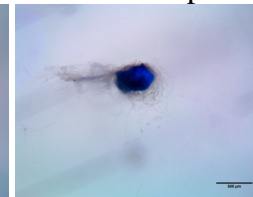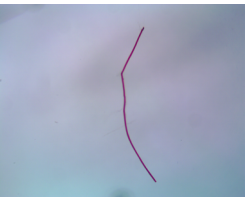

143  
144 Sample 35

Sample 36

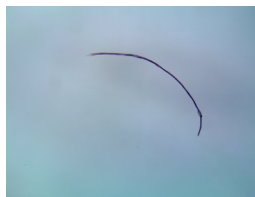

145  
146 Sample 43

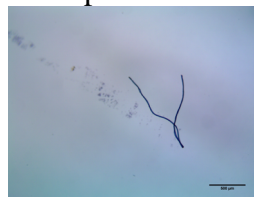

Sample 48

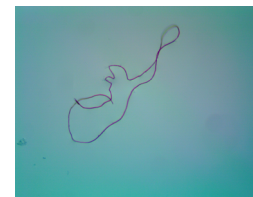

Sample 57

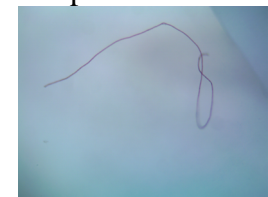

Sample 58



147  
148  
149

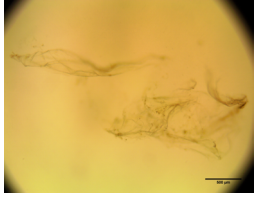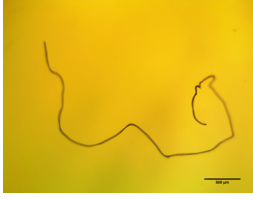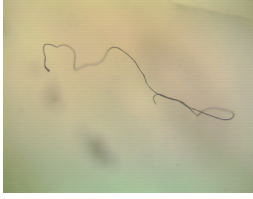

Sample 59

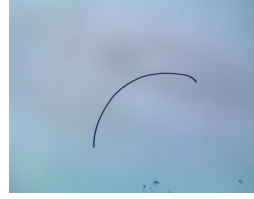

Sample 62
